# Supplementary material for: A pre-existing population of ZEB2+ quiescent cells with stemness and mesenchymal features dictate chemoresistance in colorectal cancer
Source: Springer Nature journal article supplement (doi:10.1186/s13046-019-1505-4), 2020-01-08
Supplement: MOESM9 [file 17692282]

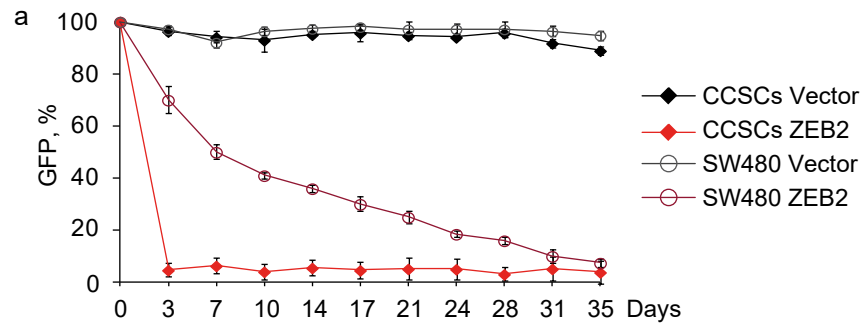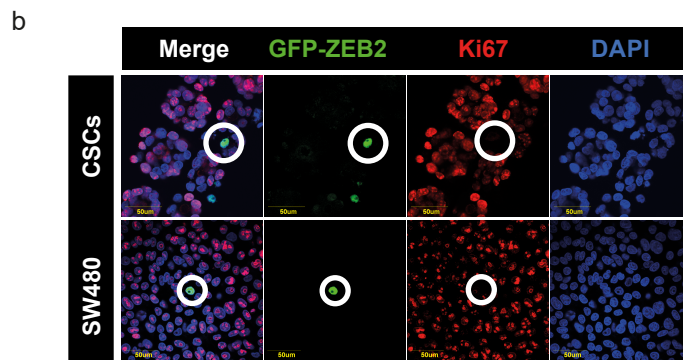

Supplementary Figure S3
