# Supplementary material for: A pre-existing population of ZEB2+ quiescent cells with stemness and mesenchymal features dictate chemoresistance in colorectal cancer
Source: J Exp Clin Cancer Res. 2020 Jan 8;39:2. doi: 10.1186/s13046-019-1505-4 (PMC6947904; doi:10.1186/s13046-019-1505-4)
Supplement: Supplementary file 3 — Additional file 3: Table S3. Primers for gene expression analysis for qRT-PCR. [file 13046_2019_1505_MOESM3_ESM.xlsx]

## Sheet: Primers
Table S3. Primers for gene expression analysis for qRT-PCR
Gene name	Sequence
ZEB1-F	AGGGCAAGAAATCCTGGGG
ZEB1-R	TGGTGTGCCCTGCCTCTGGT
CDH1-F	CCTGGGACTCCACCTACAGA
CDH1-R	TGGATTCCAGAAACGGAGGC
VIM-F	GGACCAGCTAACCAACGACA
VIM-R	AAGGTCAAGACGTGCCAGA
SNAI1-F	GGCCCTGGCTGCTACAAGGC
SNAI1-R	CTCGAGGGTCAGCGGGGAC
SNAI2-F	GATGCCGCGCTCCTTCCTGG
SNAI2-R	GGCCATTGGGTAGCTGGGC
CDKN1B-F	GGTTAGCGGAGCAATGCG
CDKN1B-R	TCCACAGAACCGGCATTTG
